# Supplementary material for: A rapid tag-free identification of Escherichia coli antibiotic-resistant isolates using Raman scattering
Source: Royal Society of Chemistry journal article supplement (doi:10.1039/c9ay01713e), 2019-01-01
Supplement: c9ay01713e1.pdf [file c9ay01713e1.pdf]

## Electronic Supplementary Information (ESI)

### A rapid tag-free identification of *Escherichia coli* antibiotic-resistant isolates using Raman scattering

Figure S1 MLST (A) forward and (B) reverse sequencing of *adh* gene for ST131 *E. coli* strain 5.

Figure S1 MLST (C) forward and (D) reverse sequencing of *fumC* gene for ST131 *E. coli* strain 5.

Figure S1 MLST (E) forward and (F) reverse sequencing of *gyrB* gene for ST131 *E. coli* strain 5.

Figure S1 MLST (G) forward and (H) reverse sequencing of *icd* gene for ST131 *E. coli* strain 5.

Figure S1 MLST (I) forward and (J) reverse sequencing of *mdh* gene for ST131 *E. coli* strain 5.

Figure S1 MLST (K) forward and (L) reverse sequencing of *purA* gene for ST131 *E. coli* strain 5.

Figure S1 MLST (M) forward and (N) reverse sequencing of *recA* gene for ST131 *E. coli* strain 5.

Figure S2 FE-SEM images of *E. coli* isolates.

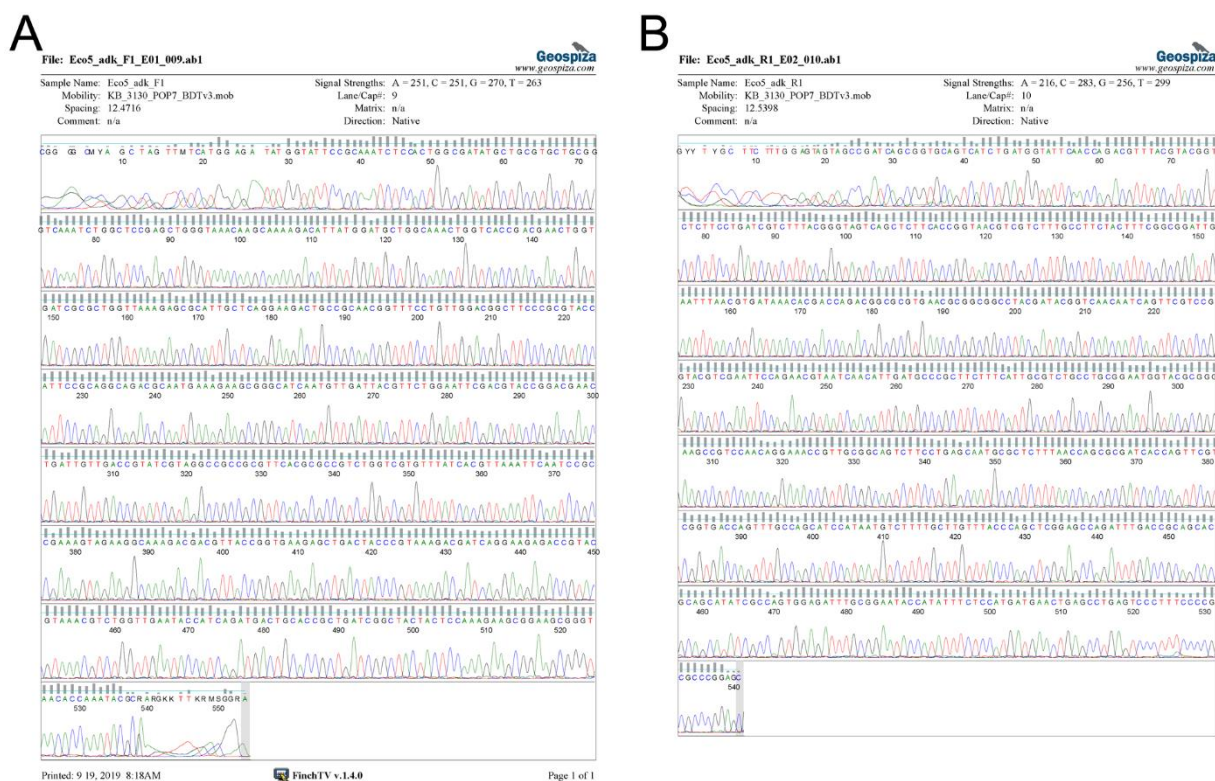

**Fig. S1** MLST (A) forward and (B) reverse sequencing of *adh* gene for ST131 *E. coli* strain 5.

C

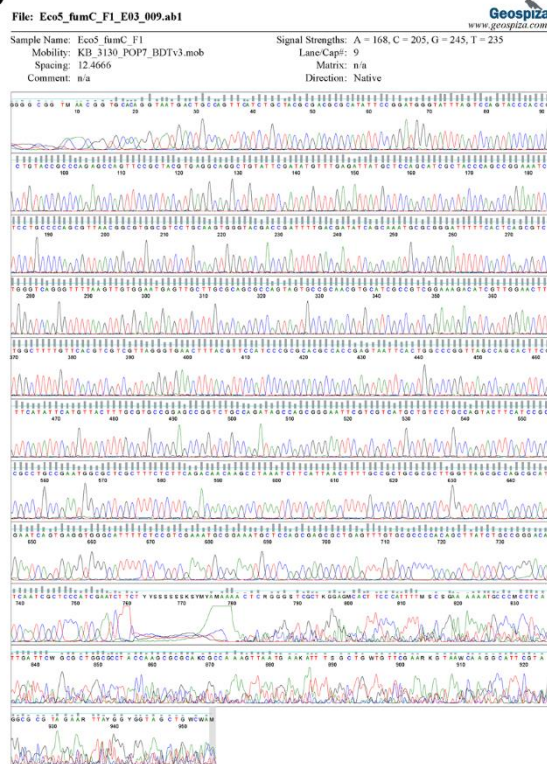

D

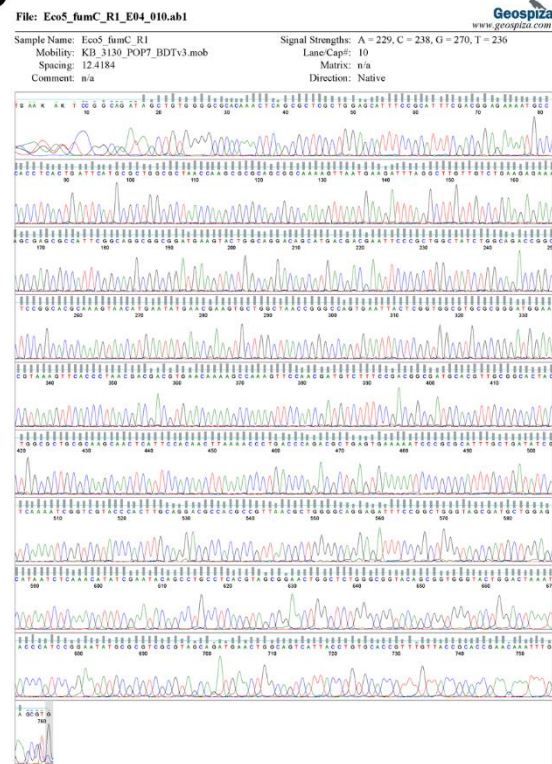

**Fig. S1 MLST (C) forward and (D) reverse sequencing of *fumC* gene for ST131 *E. coli* strain 5.**

E

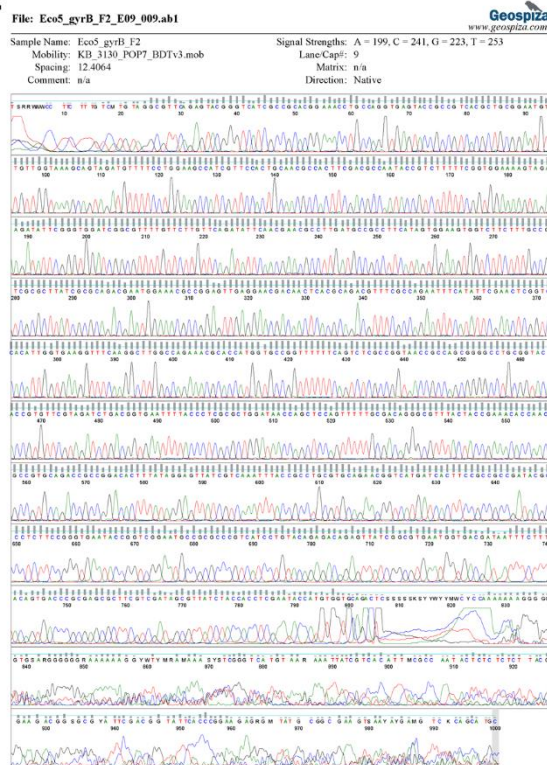

F

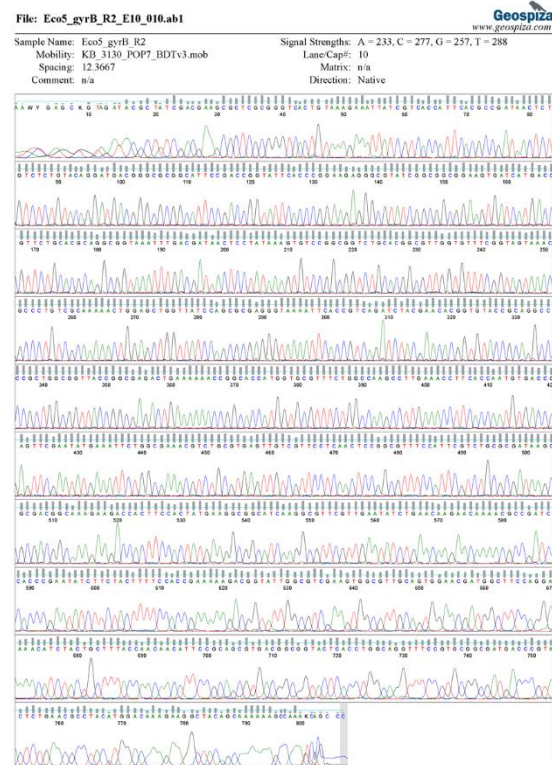

**Fig. S1 MLST (E) forward and (F) reverse sequencing of *gyrB* gene for ST131 *E. coli* strain 5.**



G

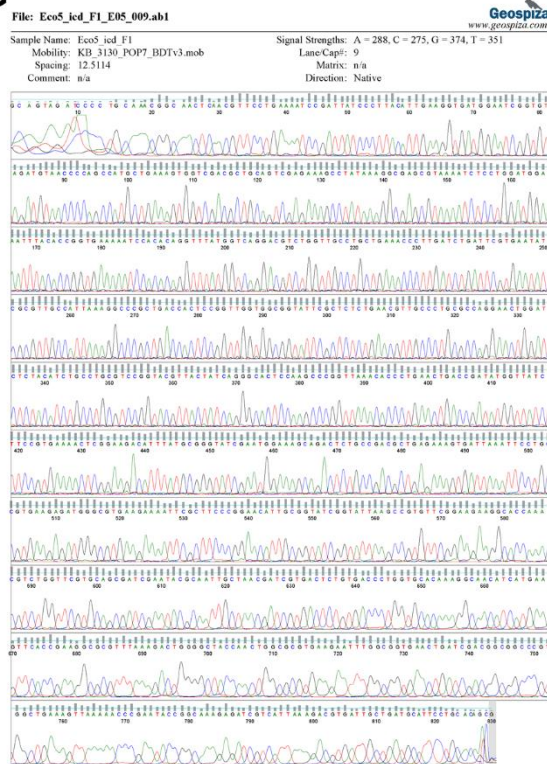

H

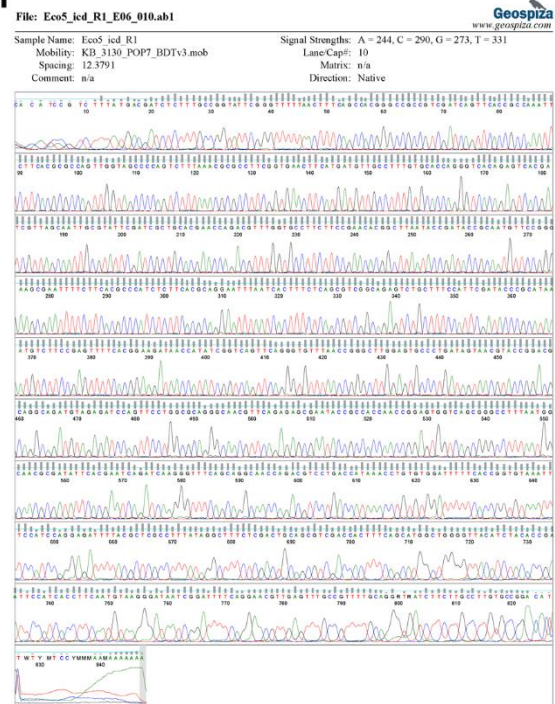

**Fig. S1 MLST (G) forward and (H) reverse sequencing of *icd* gene for ST131 *E. coli* strain 5.**

I

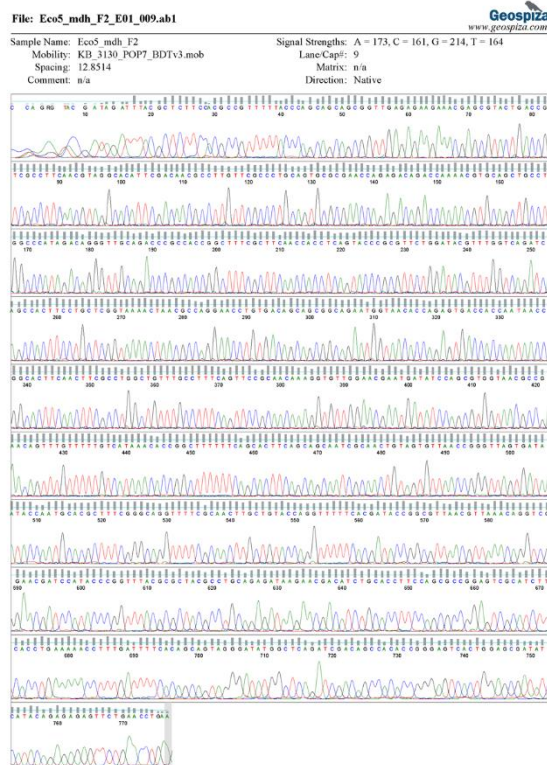

J

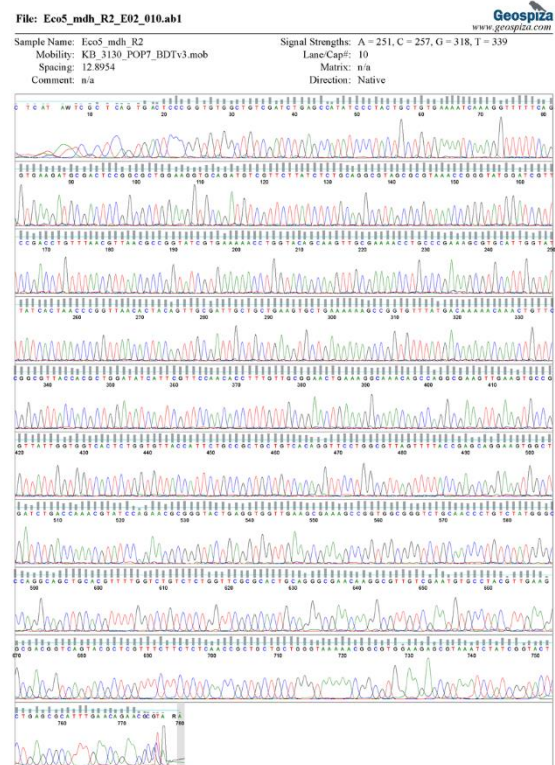

**Fig. S1 MLST (I) forward and (J) reverse sequencing of *mdh* gene for ST131 *E. coli* strain 5.**



K

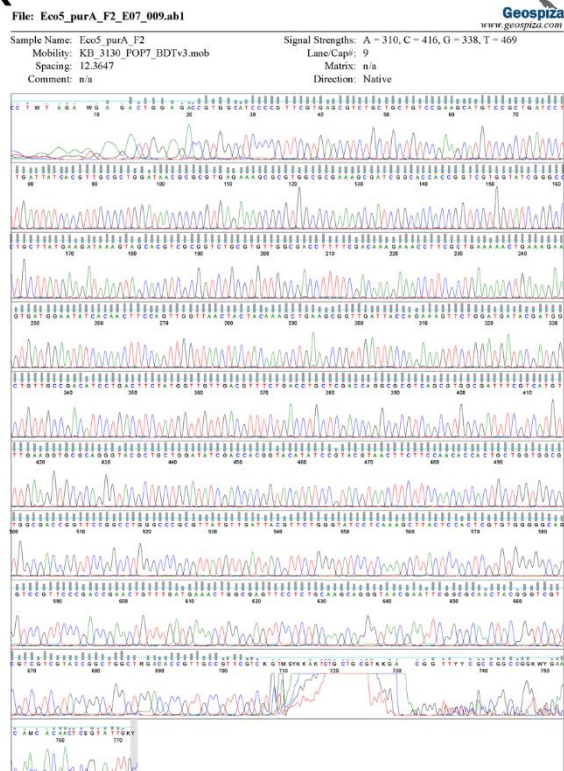

L

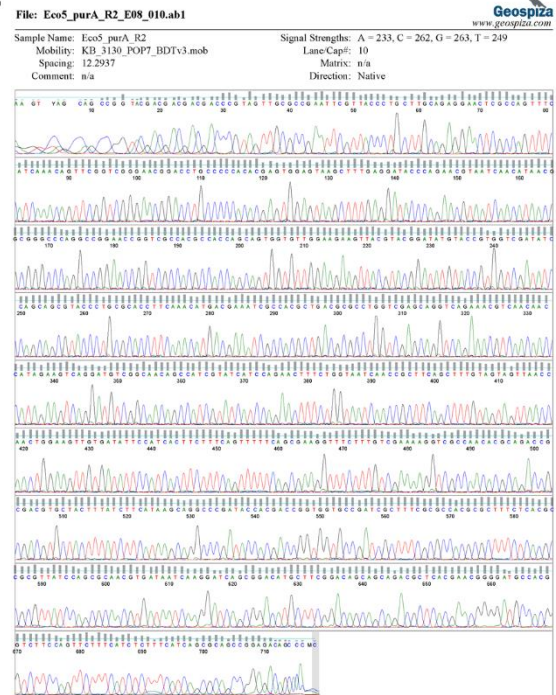

**Fig. S1 MLST (K) forward and (L) reverse sequencing of *purA* gene for ST131 *E. coli* strain 5.**

M

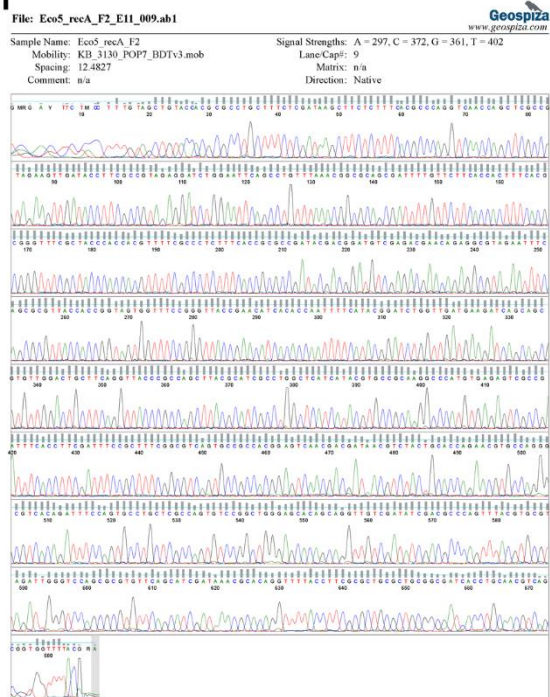

N

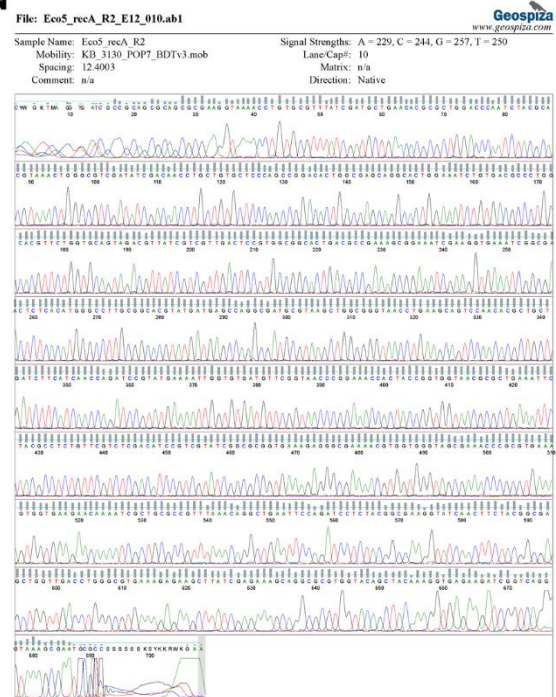

**Fig. S1 MLST (M) forward and (N) reverse sequencing of *recA* gene for ST131 *E. coli* strain 5.**

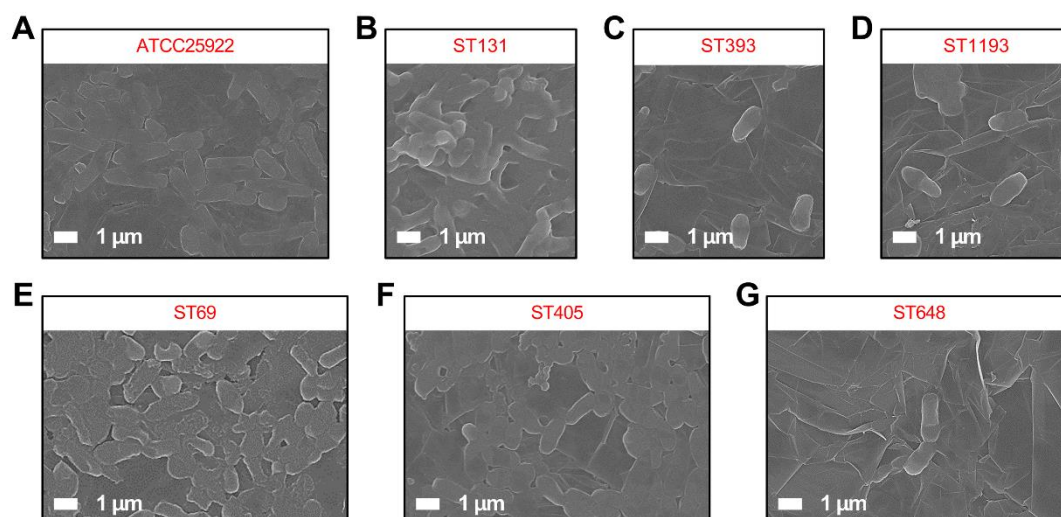

**Fig. S2** FE-SEM images of (A) *E. coli* ATCC25922, (B) *E. coli* ST131, (C) *E. coli* ST393, (D) *E. coli* ST1193, (E) *E. coli* ST69, (F) *E. coli* ST405, and (G) *E. coli* ST648 isolates.
